# Supplementary material
Source: MDPI journal article supplement (https://www.mdpi.com/2313-5778/7/2/29)
Supplement: s1 [file s1]

**Table S6:** Allele frequencies of the populations used for Correspondence Analysis for those alleles that make that the Basque Country

| <b>Poblaciones</b> | <b>D13S317<br/>Allele 8</b> | <b>TPOX<br/>Allele 12</b> | <b>TH01<br/>Allele 9.3</b> |
|--------------------|-----------------------------|---------------------------|----------------------------|
| <i>GMA</i>         | 0.16122                     | 0.02449                   | 0.27143                    |
| <i>MorMOR</i>      | 0.07600                     | 0.00000                   | 0.13600                    |
| <i>ArbMOR</i>      | 0.09900                     | 0.01500                   | 0.11700                    |
| <i>BAsMOR</i>      | 0.08100                     | 0.01000                   | 0.07600                    |
| <i>BBoMOR</i>      | 0.07700                     | 0.02900                   | 0.10100                    |
| <i>UppEGY</i>      | 0.12600                     | 0.01100                   | 0.08100                    |
| <i>TunTUN</i>      | 0.10200                     | 0.01300                   | 0.14900                    |
| <i>BKeTUN</i>      | 0.05800                     | 0.01100                   | 0.14300                    |
| <i>TurTUR</i>      | 0.12600                     | 0.02300                   | 0.18200                    |
| <i>SyrSYR</i>      | 0.14700                     | 0.02500                   | 0.13300                    |
| <i>BasSPA</i>      | 0.32000                     | 0.04100                   | 0.37000                    |
| <i>CatSPA</i>      | 0.10200                     | 0.04100                   | 0.36700                    |
| <i>AndSPA</i>      | 0.11400                     | 0.05600                   | 0.29200                    |
| <i>NEsSPA</i>      | 0.12990                     | 0.03190                   | 0.31860                    |
| <i>ItaITA</i>      | 0.13150                     | 0.02700                   | 0.21882                    |
| <i>GreGRE</i>      | 0.12100                     | 0.03000                   | 0.22200                    |
