# Supplementary material
Source: MDPI journal article supplement (https://www.mdpi.com/2313-5778/7/2/29)
Supplement: s1 [file s1]

**Table S5:** Observed surnames in the GMA population.

| Surnames               | n   | k   | Singletons |
|------------------------|-----|-----|------------|
| First surname          | 245 | 165 | 136        |
| Second surname         | 245 | 149 | 107        |
| First + second surname | 490 | 266 | 197        |

n, simple size; k, number of different surnames
