# Supplementary material
Source: MDPI journal article supplement (https://www.mdpi.com/2313-5778/7/2/29)
Supplement: s1 [file s1]

**Table S2:** Population pairwise FSTs (above diagonal) and p-values (below diagonal)

|         | Almería  | Granada  | Málaga  |
|---------|----------|----------|---------|
| Almería | 0.00000  | 0.51351  | 0.69369 |
| Granada | 0.00003  | 0.00000  | 0.95495 |
| Málaga  | -0.00062 | -0.00165 | 0.00000 |
