# Supplementary material
Source: MDPI journal article supplement (https://www.mdpi.com/2313-5778/7/2/29)
Supplement: s1 [file s1]

**Table S4:** Evanno table from the 10 replicate runs of Structure calculated with Structure Harvester.

| K  | Reps | Mean LnP(K)   | Stdev LnP(K) | Ln'(K)       | Ln''(K)     | Delta K    |
|----|------|---------------|--------------|--------------|-------------|------------|
| 2  | 10   | -96410.370000 | 263.834077   | —            | —           | —          |
| 3  | 10   | -94428.600000 | 3.947432     | 1981.770000  | 1826.770000 | 462.774238 |
| 4  | 10   | -94273.600000 | 4.928150     | 155.000000   | 54.290000   | 11.016303  |
| 5  | 10   | -94172.890000 | 126.066900   | 100.710000   | 2576.400000 | 20.436768  |
| 6  | 10   | -96648.580000 | 8132.643695  | -2475.690000 | 4744.090000 | 0.583339   |
| 7  | 10   | -94380.180000 | 928.555972   | 2268.400000  | 2189.080000 | 2.357510   |
| 8  | 10   | -94300.860000 | 669.771585   | 79.320000    | 219.500000  | 0.327724   |
| 9  | 10   | -94441.040000 | 812.714602   | -140.180000  | 354.430000  | 0.436106   |
| 10 | 10   | -94226.790000 | 589.869484   | 214.250000   | —           | —          |
