# Supplementary material
Source: MDPI journal article supplement (https://www.mdpi.com/2313-5778/7/2/29)
Supplement: s1 [file s1]

**Table S1:** AMOVA design and results from 245 individuals.

| Structure design                                                                                     | Source of variation                  | d.f. | Sum of squares | Variance components | Percentage of variation                                        |
|------------------------------------------------------------------------------------------------------|--------------------------------------|------|----------------|---------------------|----------------------------------------------------------------|
| <b>3 Groups:</b><br><br><b>Group 1= Granada</b><br><b>Group 2= Málaga</b><br><b>Group 3= Almería</b> | Among populations                    | 2    | 10.234         | -0.00542 Va         | -0.09                                                          |
|                                                                                                      | Among individuals within populations | 242  | 1451.158       | 0.13602 Vb          | 2.32                                                           |
|                                                                                                      | Within populations                   | 245  | 1402.500       | 5.72449 Vc          | 97.77                                                          |
|                                                                                                      | Total                                | 489  | 2863.892       | 5.85509             | Fixation index<br>FIS:0.02321<br>FST: -0.00099<br>FIT: 0.02230 |
