# Supplementary material
Source: MDPI journal article supplement (https://www.mdpi.com/2313-5778/7/2/29)
Supplement: s1 [file s1]

**Table S3:** Complete list of populations used in the present study for comparative analysis

| POPULATION                 | Code   | Country | a-STRs | N   | References                                                             |
|----------------------------|--------|---------|--------|-----|------------------------------------------------------------------------|
| ALLELIC FREQUENCY ANALYSIS |        |         |        |     |                                                                        |
| Granada_Málaga_Almería     | GMA    | Spain   | 15     | 245 | Present study                                                          |
| Berbers from Asni          | BAsMOR | Morocco | 15     | 105 | Coudray <i>et al.</i> , 2007 (Coudray, Guitard, et al. 2007)           |
| Berbers from Bouhria       | BBoMOR | Morocco | 15     | 104 | Coudray <i>et al.</i> , 2007 (Coudray, Guitard, et al. 2007)           |
| Arabs from Morocco         | ArbMOR | Morocco | 15     | 138 | Abdin <i>et al.</i> , 2003 (Abdin et al. 2003)                         |
| Upper Egypt                | UppEGY | Egypt   | 15     | 265 | Omran <i>et al.</i> , 2009 (Omran, Rutty, and Jobling 2009)            |
| Tunisia                    | TunTUN | Tunisia | 15     | 200 | Brandt-Casadevall <i>et al.</i> , 2002 (Brandt-Casadevall et al. 2002) |
| Berbers from Kesra         | BKeTUN | Tunisia | 15     | 44  | Cherni <i>et al.</i> , 2005 (Cherni et al. 2005)                       |
| Turkey                     | TurTUR | Turkey  | 13     | 198 | Akbasak <i>et al.</i> , 2001 (Akbasak et al. 2001)                     |
| Syria                      | SyrSYR | Syria   | 15     | 121 | Abdin <i>et al.</i> , 2003 (Abdin et al. 2003)                         |
| Basque Country             | BasSPA | Spain   | 13     | 100 | Pérez-Lezaun <i>et al.</i> , 2000 (Pérez-Lezaun et al. 2000)           |
| Catalonia                  | CatSPA | Spain   | 13     | 96  | Pérez-Lezaun <i>et al.</i> , 2000 (Pérez-Lezaun et al. 2000)           |
| Andalusia                  | AndSPA | Spain   | 13     | 72  | Pérez-Lezaun <i>et al.</i> , 2000 (Pérez-Lezaun et al. 2000)           |
| Northeast of Spain         | NEsSPA | Spain   | 16     | 204 | Paredes <i>et al.</i> , 2003 (Paredes et al. 2003)                     |
| STRUCTURE ANALYSIS         |        |         |        |     |                                                                        |
| Morocco                    | Mor    | Morocco | 15     | 210 | Bouabdellah <i>et al.</i> , 2008 (Bouabdellah et al. 2008)             |
| Libya                      | Lib    | Lybia   | 15     | 230 | Elmrghni <i>et al.</i> , 2012 (Elmrghni et al. 2012)                   |

|                     |      |              |    |     |                                                                            |
|---------------------|------|--------------|----|-----|----------------------------------------------------------------------------|
| <b>Somalia</b>      | Som  | Somalia      | 15 | 404 | Tillmar <i>et al.</i> , 2009 (Tillmar, Bäckström, and Montelius 2009)      |
| <b>South Africa</b> | SrAf | South Africa | 15 | 324 | Schlebusch <i>et al.</i> , 2012 (Schlebusch, Soodyall, and Jakobsson 2012) |
| <b>Spain</b>        | Spa  | Spain        | 15 | 202 | Martínez-González <i>et al</i> Unpublished data                            |
| <b>Huelva</b>       | Hue  | Spain        | 15 | 114 | Coudray <i>et al.</i> , 2007 (Coudray, Calderon, et al. 2007)              |
| <b>Italy</b>        | Ita  | Italy        | 13 | 400 | Brisighelli <i>et al.</i> , 2009 (Brisighelli et al. 2009)                 |
| <b>Sweden</b>       | Swe  | Sweden       | 15 | 200 | Tillmar <i>et al.</i> Unpublished data                                     |

### Supplementary references

- Abdin, L, I Shimada, B Brinkmann, and C Hohoff. 2003. "Analysis of 15 Short Tandem Repeats Reveals Significant Differences between the Arabian Populations from Morocco and Syria." *Legal Medicine* 5 (SUPPL. 1): 150–55. <http://www.scopus.com/inward/record.url?eid=2-s2.0-0038077549&partnerID=40&md5=63b8236bf80324331fd3f976c060119a>.
- Akbasak, B S, B Budowle, D J Reeder, J Redman, and M C Kline. 2001. "Turkish Population Data with the CODIS Multiplex Short Tandem Repeat Loci." *Forensic Science International* 123 (2–3): 227–29. <http://www.scopus.com/inward/record.url?eid=2-s2.0-0035577928&partnerID=40&md5=edfcf07d167560778ce4d51d3fcf443d>.
- Bouabdellah, M, F Ouenzar, R Aboukhalid, M Elmzibri, D Squalli, and S Amzazi. 2008. "STR Data for the 15 AmpFISTR Identifier Loci in the Moroccan Population." *Progress in Forensic Genetics 12 - Proceedings of the 22nd International ISFG Congress 1* (1): 306–8. <https://doi.org/DOI: 10.1016/j.fsigss.2007.10.123>.
- Brandt-Casadevall, C, M B Dhiab, F Taroni, C Gehrig, N Dimo-Simonin, M Zemni, and P Mangin. 2002. "Tunisian Population Data on 15 PCR-Based Loci." *Forensic Science International* 126 (3): 272–74. <http://www.scopus.com/inward/record.url?eid=2-s2.0-0037162130&partnerID=40&md5=1e28e2751086e38de15fc19f7d4be6fd>.
- Brisighelli, F, C Capelli, I Boschi, P Garagnani, M V Lareu, V L Pascali, and A Carracedo. 2009. "Allele Frequencies of Fifteen STRs in a Representative Sample of the Italian Population." *Forensic Science International: Genetics* 3 (2): e29–30. <http://www.scopus.com/inward/record.url?eid=2-s2.0-59649094582&partnerID=40&md5=f334668b42436efb234bf572f63466c6>.
- Cherni, L, B Loueslati Yaâcoubi, L Pereira, C Alves, H Khodjet El Kill, A Ben Ammar El Gaaied, and A Amorim. 2005. "Data for 15 Autosomal STR Markers (Powerplex

- 16 System) from Two Tunisian Populations: Kesra (Berber) and Zriba (Arab)." *Forensic Science International* 147 (1): 101–6. <https://doi.org/DOI:10.1016/j.forsciint.2004.04.009>.
- Coudray, C, R Calderon, E Guitard, B Ambrosio, A González-Martín, and J M Dugoujon. 2007. "Allele Frequencies of 15 Tetrameric Short Tandem Repeats (STRs) in Andalusians from Huelva (Spain)." *Forensic Science International* 168 (2–3): e21–24. <https://doi.org/10.1016/j.forsciint.2007.01.016>.
- Coudray, C, E Guitard, C Keyser-Tracqui, M Melhaoui, M Cherkaoui, G Larrouy, and J -M Dugoujon. 2007. "Population Genetic Data of 15 Tetrameric Short Tandem Repeats (STRs) in Berbers from Morocco." *Forensic Science International* 167 (1): 81–86. <http://www.scopus.com/inward/record.url?eid=2-s2.0-33947113886&partnerID=40&md5=a9e29b21c2fe8bb83c33dc6c75dee0fc>.
- Elmrghni, S, R A Dixon, Y M Coulson-Thomas, and D R Williams. 2012. "Genetic Data Provided by 15 Autosomal STR Loci in the Libyan Population Living in Benghazi." *Forensic Science International: Genetics* 6 (3): e93–94. <http://www.scopus.com/inward/record.url?eid=2-s2.0-84858449639&partnerID=40&md5=23f2f6fa712dff5598900513635a7eeb>.
- Omran, G A, G N Ratty, and M A Jobling. 2009. "Genetic Variation of 15 Autosomal STR Loci in Upper (Southern) Egyptians." *Forensic Science International: Genetics* 3 (2): e39–44. <http://www.scopus.com/inward/record.url?eid=2-s2.0-59649096262&partnerID=40&md5=b501d97c1bb5e9297a52ea7d1d21fc25>.
- Paredes, M, M Crespillo, J A Luque, and J L Valverde. 2003. "STR Frequencies for the PowerPlex® 16 System Kit in a Population from Northeast Spain." *Forensic Science International* 135 (1): 75–78. [https://doi.org/DOI:10.1016/S0379-0738\(03\)00172-5](https://doi.org/DOI:10.1016/S0379-0738(03)00172-5).
- Pérez-Lezaun, A., F. Calafell, J. Clarimón, E. Bosch, E. Mateu, L. Gusmão, A. Amorim, N. Benchemsi, and J. Bertranpetit. 2000. "Allele Frequencies of 13 Short Tandem Repeats in Population Samples from the Iberian Peninsula and Northern Africa." *International Journal of Legal Medicine* 113 (4): 208–14. <http://www.scopus.com/inward/record.url?eid=2-s2.0-0343628829&partnerID=tZOtx3y1>.
- Schlebusch, C M, H Soodyall, and M Jakobsson. 2012. "Genetic Variation of 15 Autosomal STR Loci in Various Populations from Southern Africa." *Forensic Science International: Genetics* 6 (1): e20–21. <http://www.scopus.com/inward/record.url?eid=2-s2.0-82655189964&partnerID=40&md5=2cbe5b727dd14d3a4d1dfc4a33cb66c7>.
- Tillmar, A O, G Bäckström, and K Montelius. 2009. "Genetic Variation of 15 Autosomal STR Loci in a Somali Population." *Forensic Science International: Genetics* 4 (1): e19–20. <https://doi.org/DOI:10.1016/j.fsigen.2009.01.004>.
