# Supplementary material
Source: MDPI journal article supplement (https://www.mdpi.com/2313-5778/7/2/29)

**Figure S1: Geographical distribution of the 245 samples.**

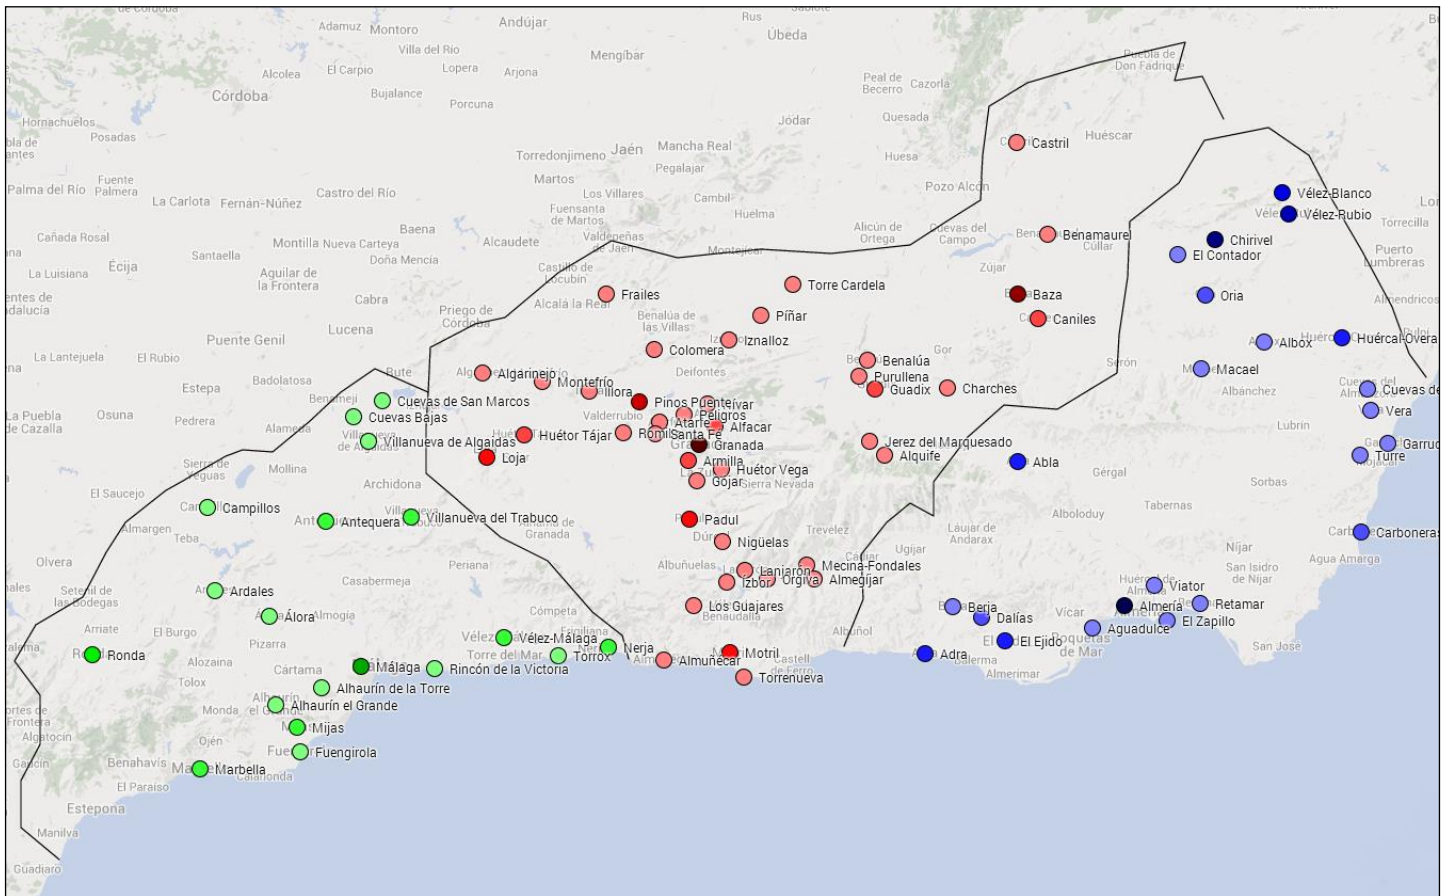

Supplement: s1 [file s1]
